# Supplementary material
Source: publisher site journal article supplement (https://www.kjim.org/upload/media/kjim-2023-097-Supplementary-Fig-2.pdf)
Supplement: Supplementary file 1 [file kjim-2023-097-Supplementary-Fig-2.pdf]

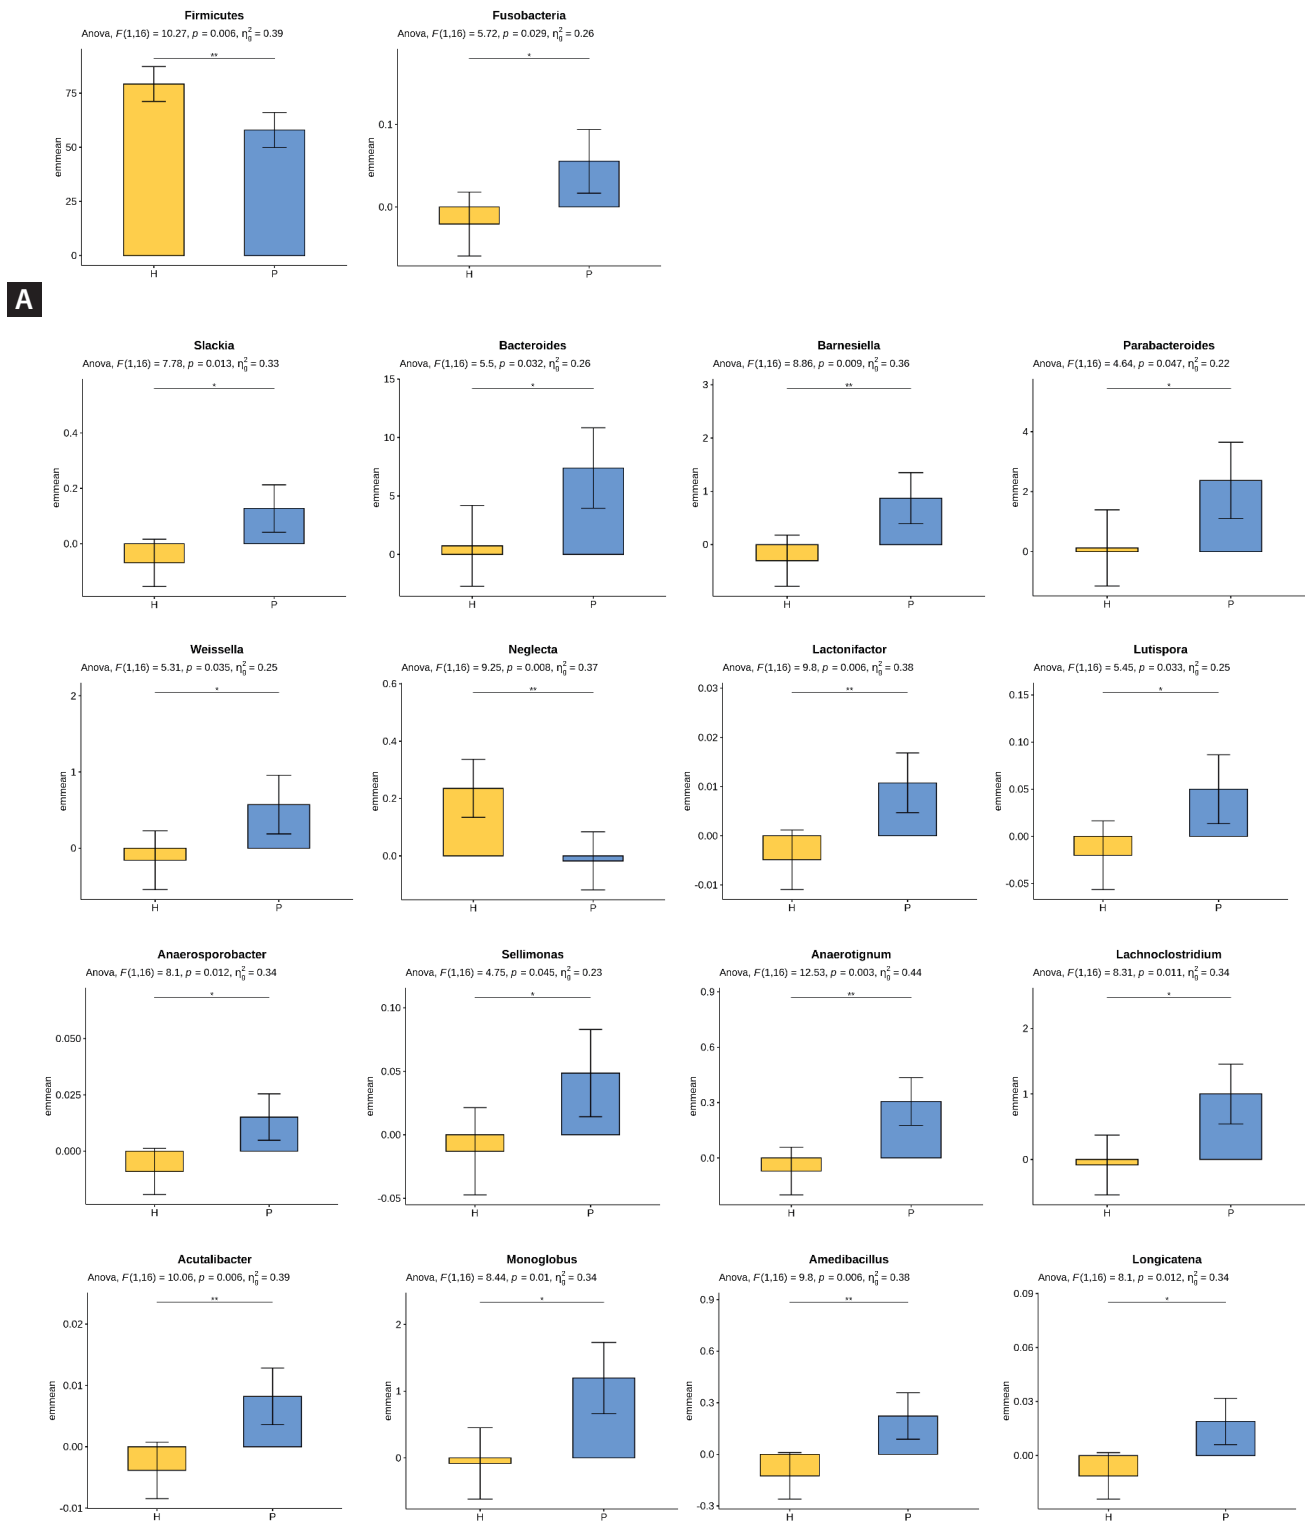

**Supplementary Figure 2.** Analysis of the gut microbiota composition. The plot shows the percentage of relative abundance compared with (A-C) P and H groups or (D, E) PL, PO, and H. Differences were assessed using analysis of covariance (ANCOVA) at the (A) phylum, (B, D) genus, and (C, E) species levels. We used pairwise comparisons to perform post hoc tests with emmeans, and Bonferroni-adjusted significance tests were performed for pairwise comparisons. H, healthy group; NTM-PD, nontuberculous mycobacteria pulmonary disease; P, NTM-PD group; PL, patients with NTM-PD with a low body mass index; PO, patients with NTM-PD with a normal or high body mass index.

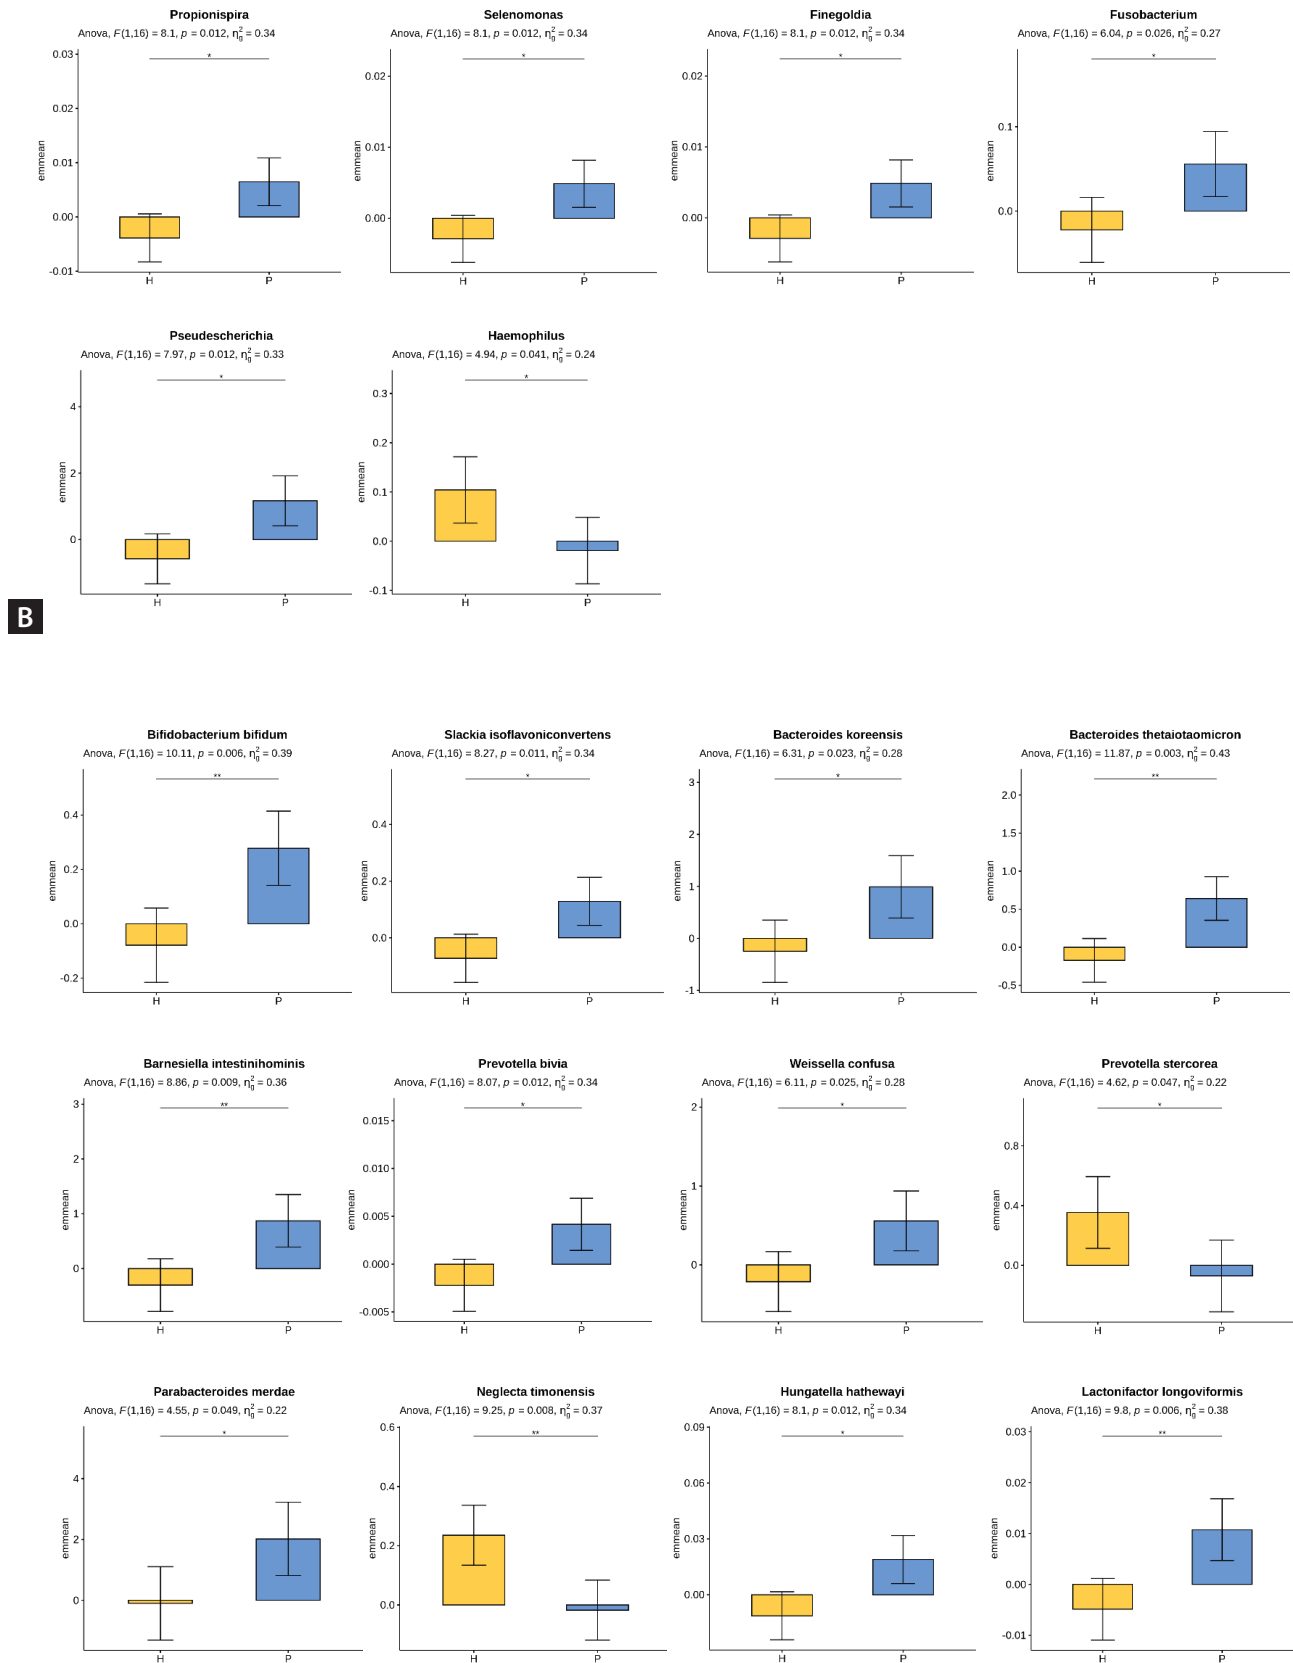

Supplementary Figure 2. Continued

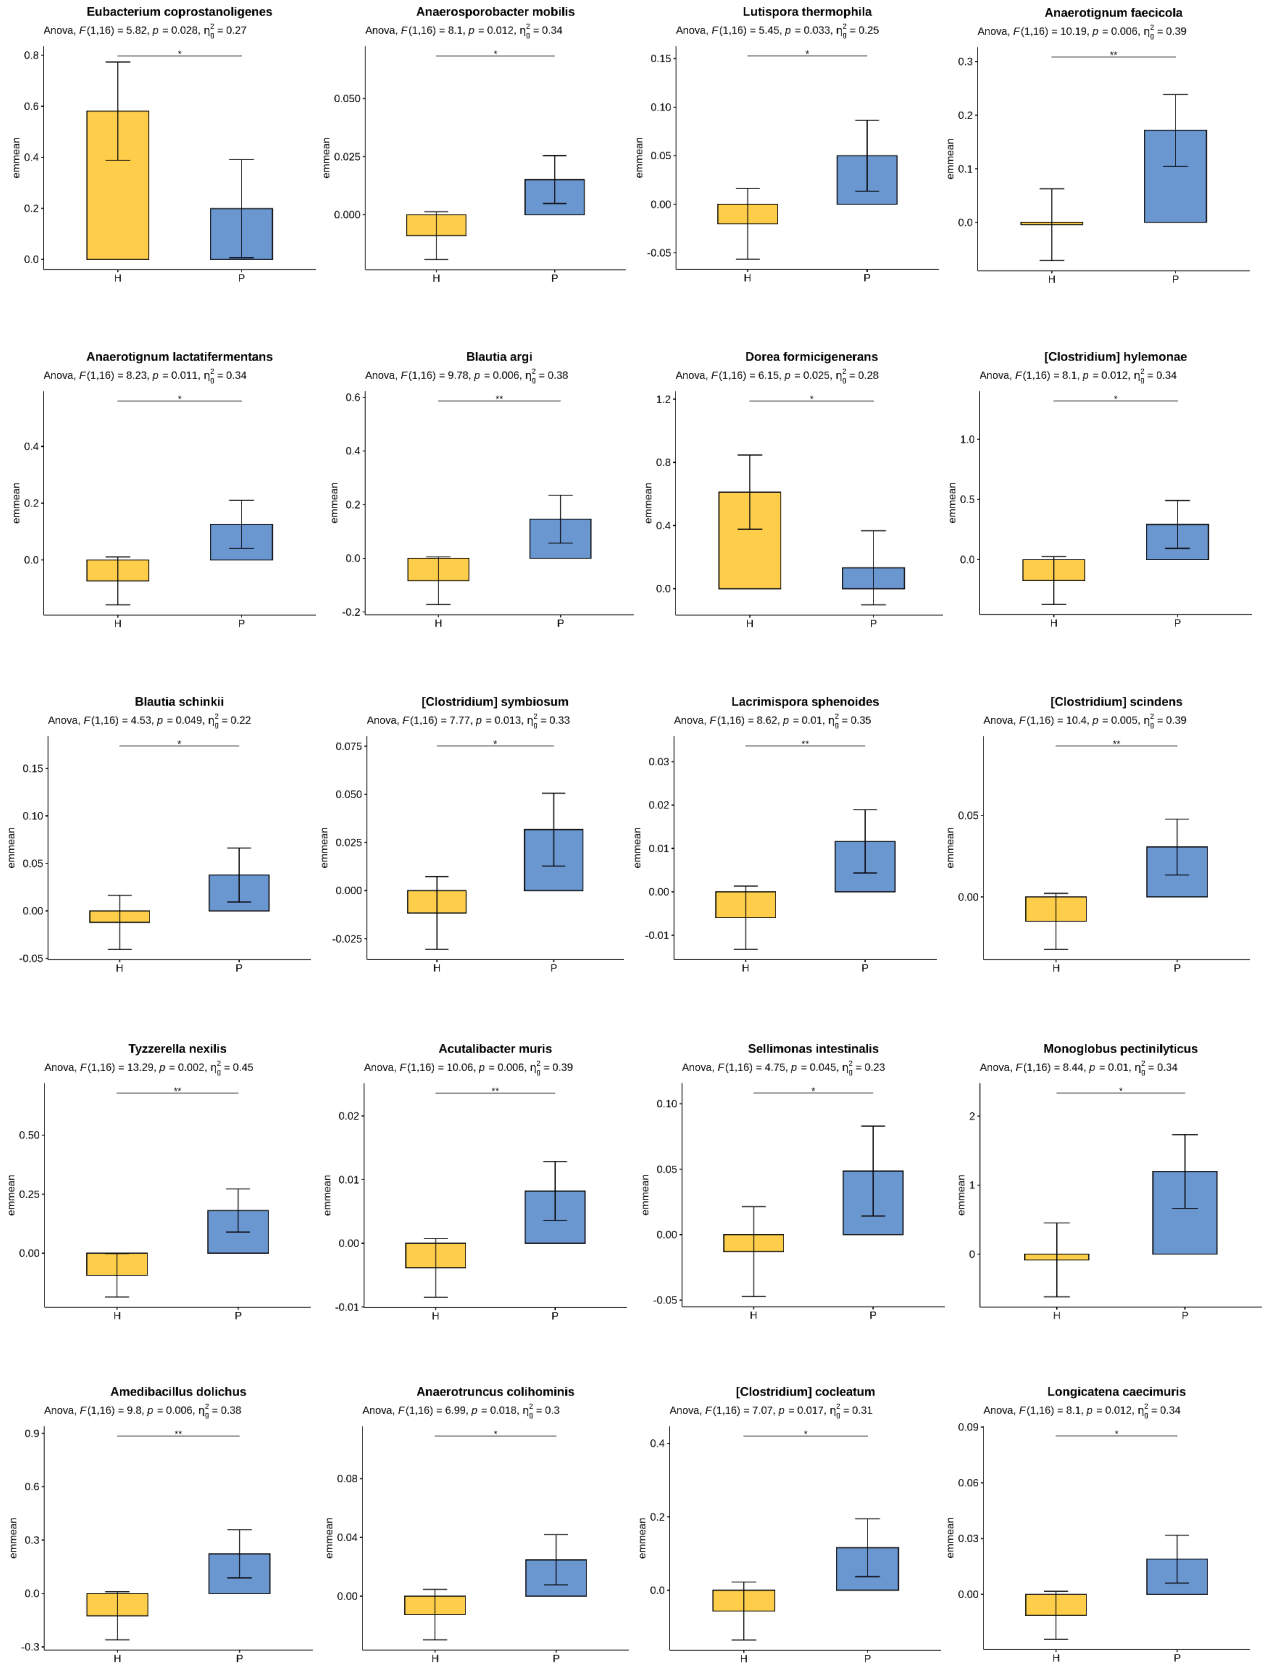

Supplementary Figure 2. Continued

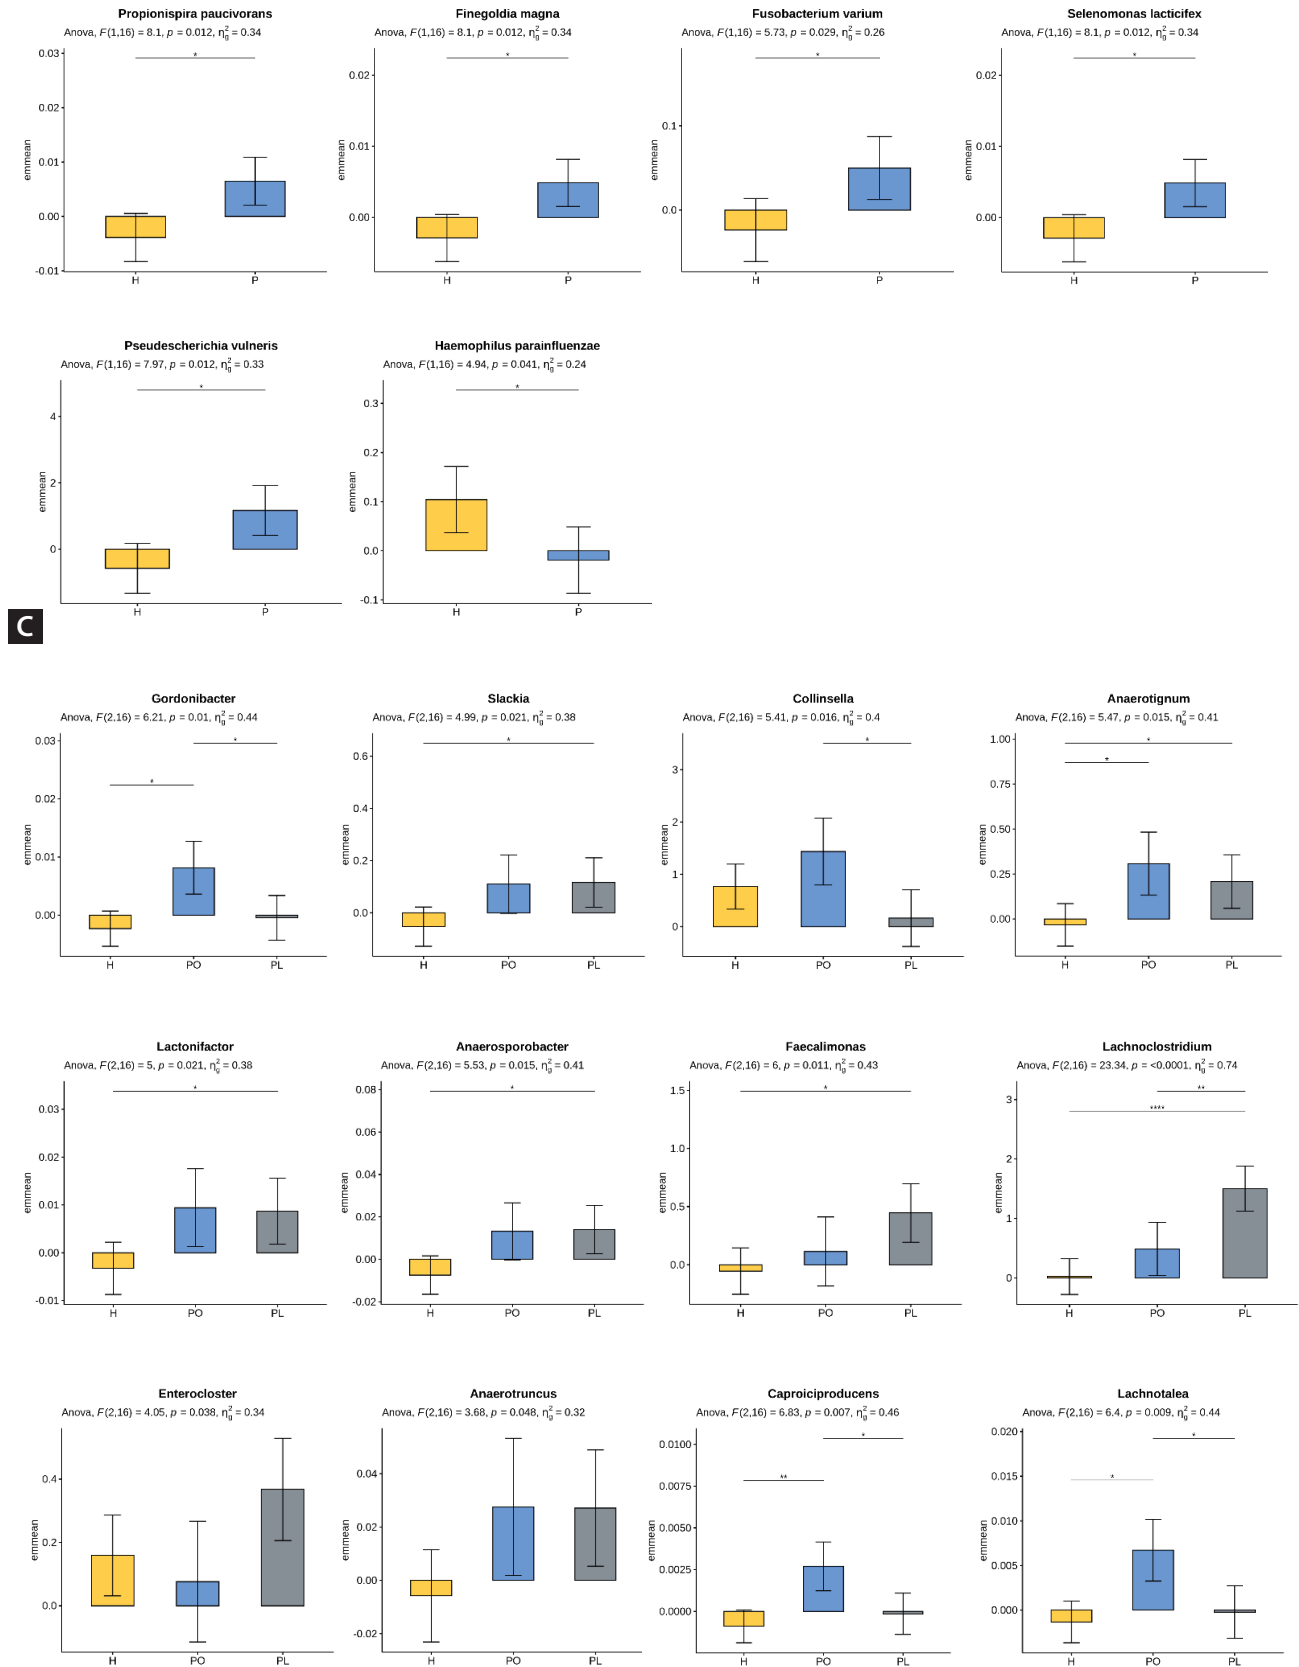

Supplementary Figure 2. Continued

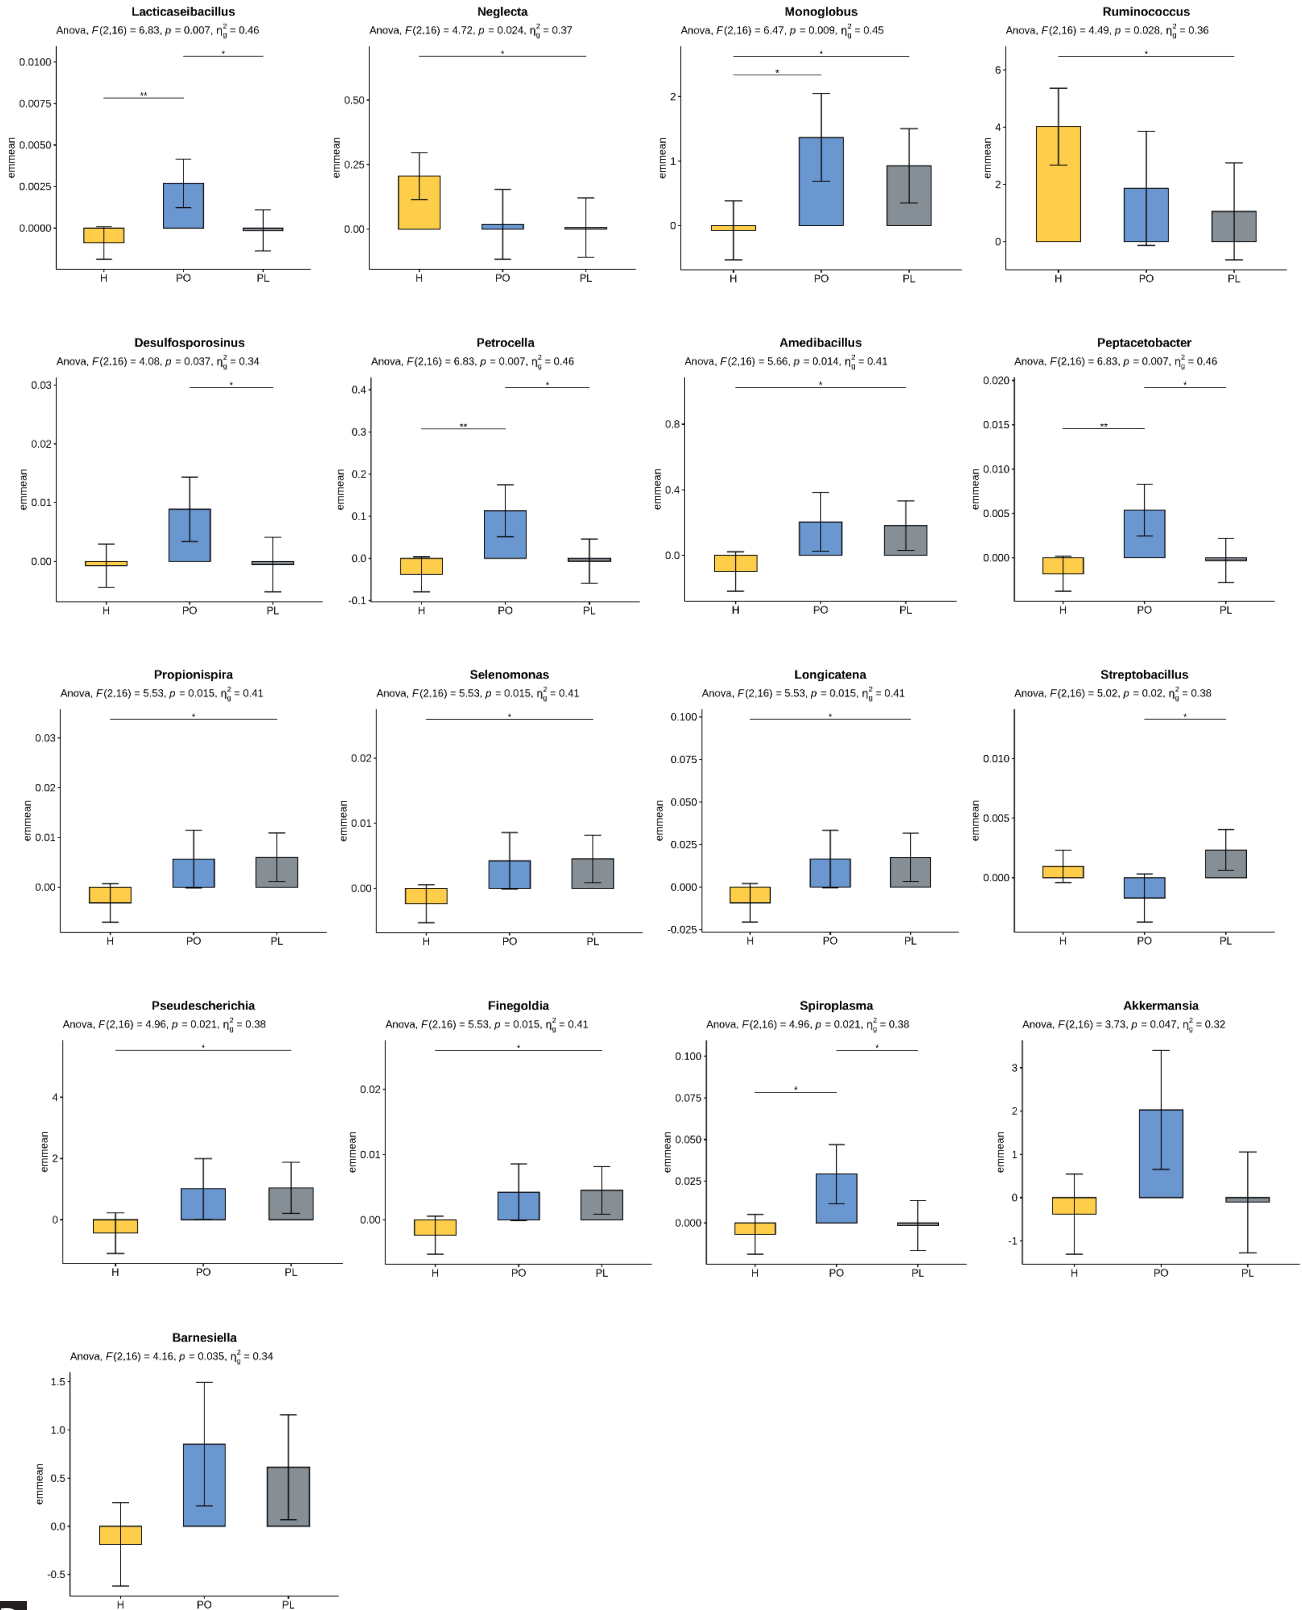

D

Supplementary Figure 2. Continued

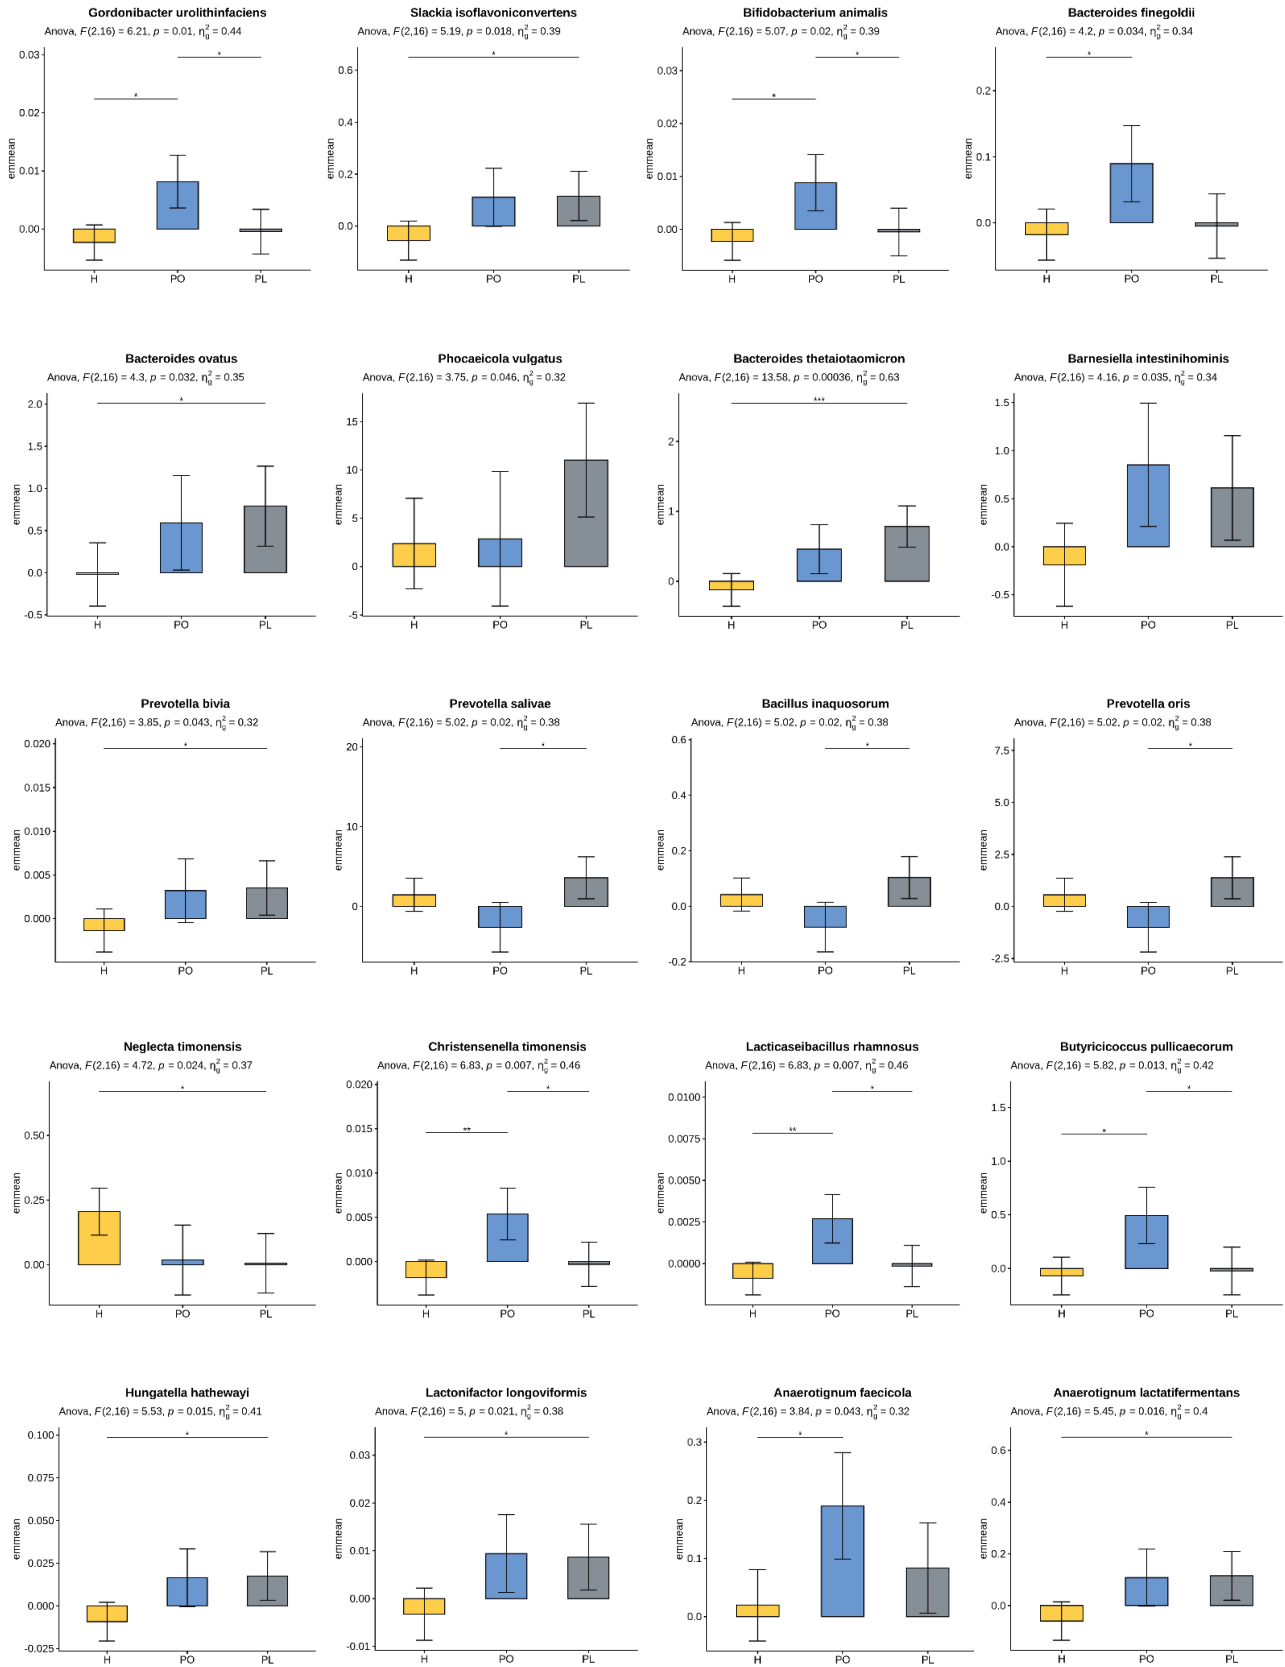

Supplementary Figure 2. Continued

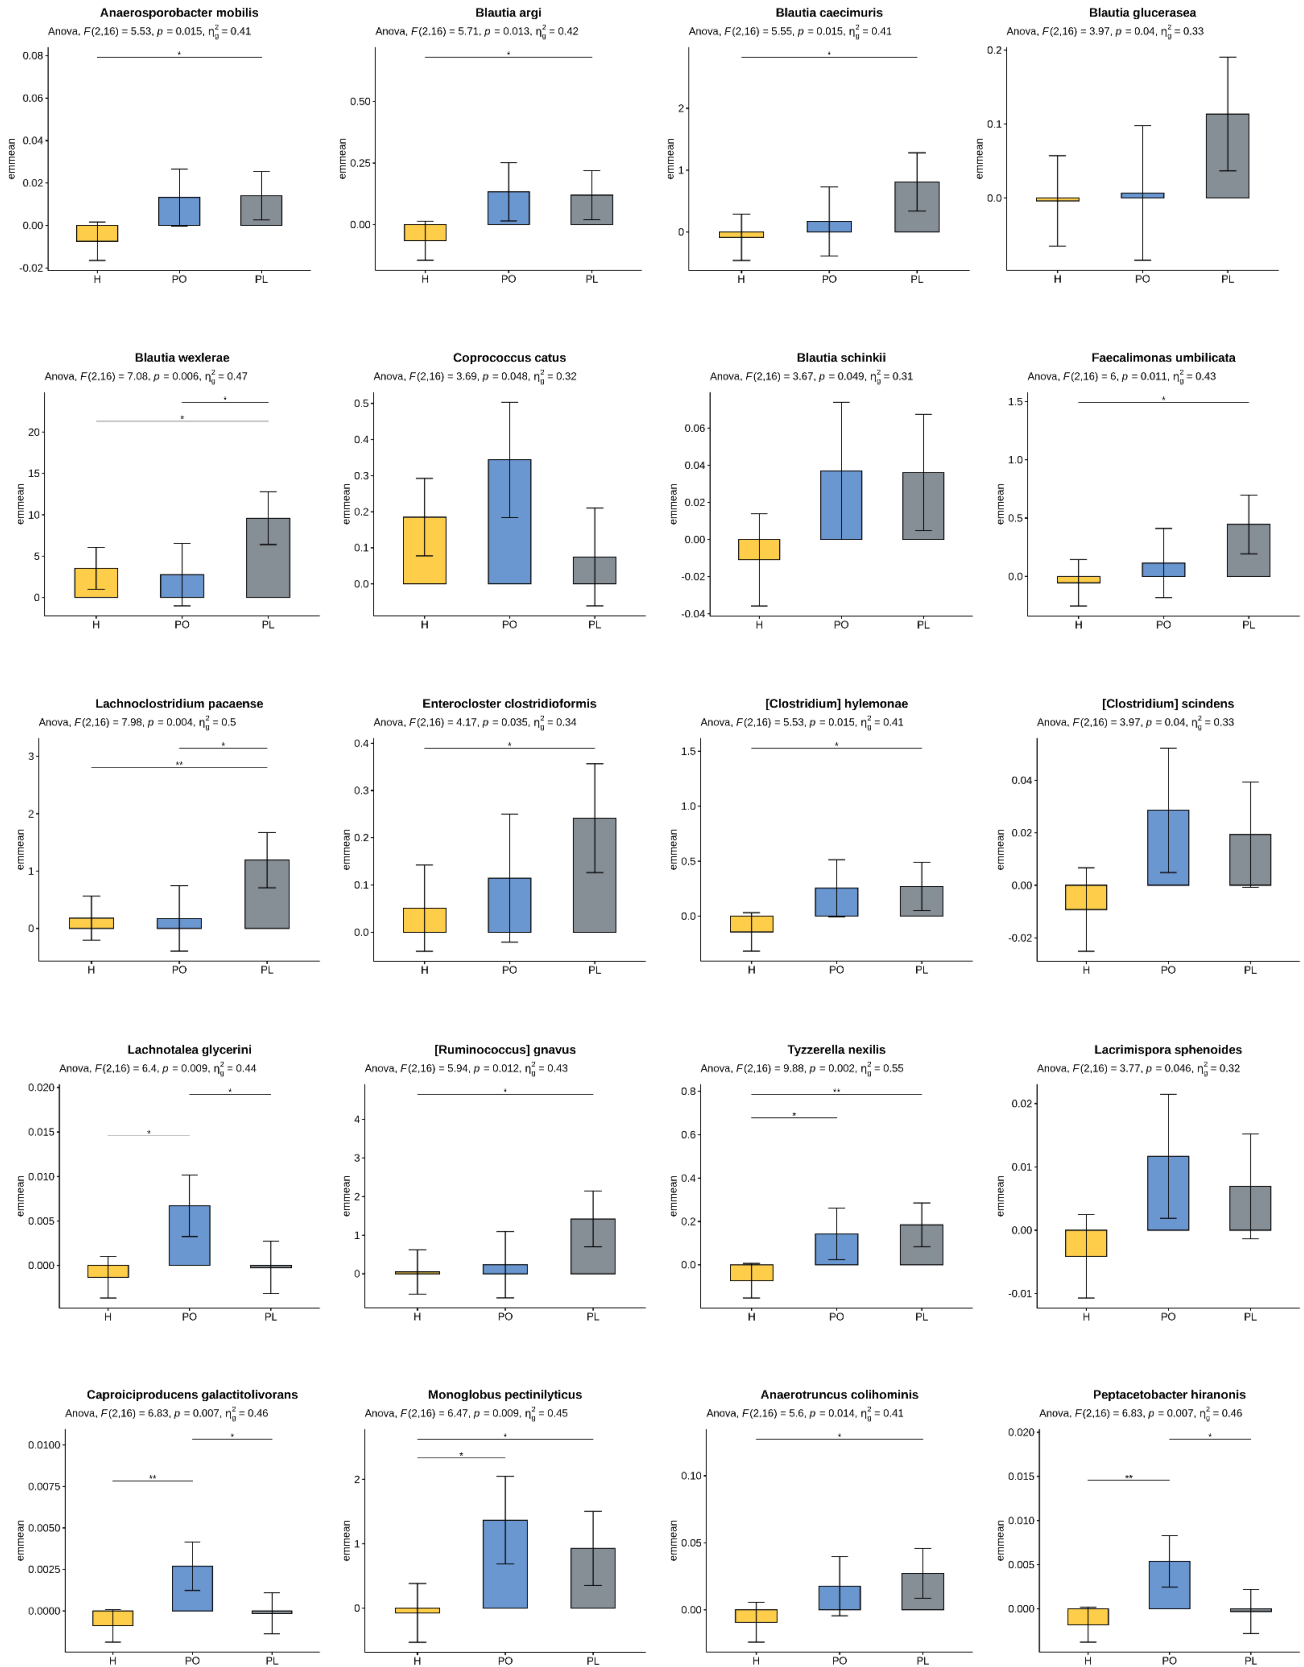

Supplementary Figure 2. Continued

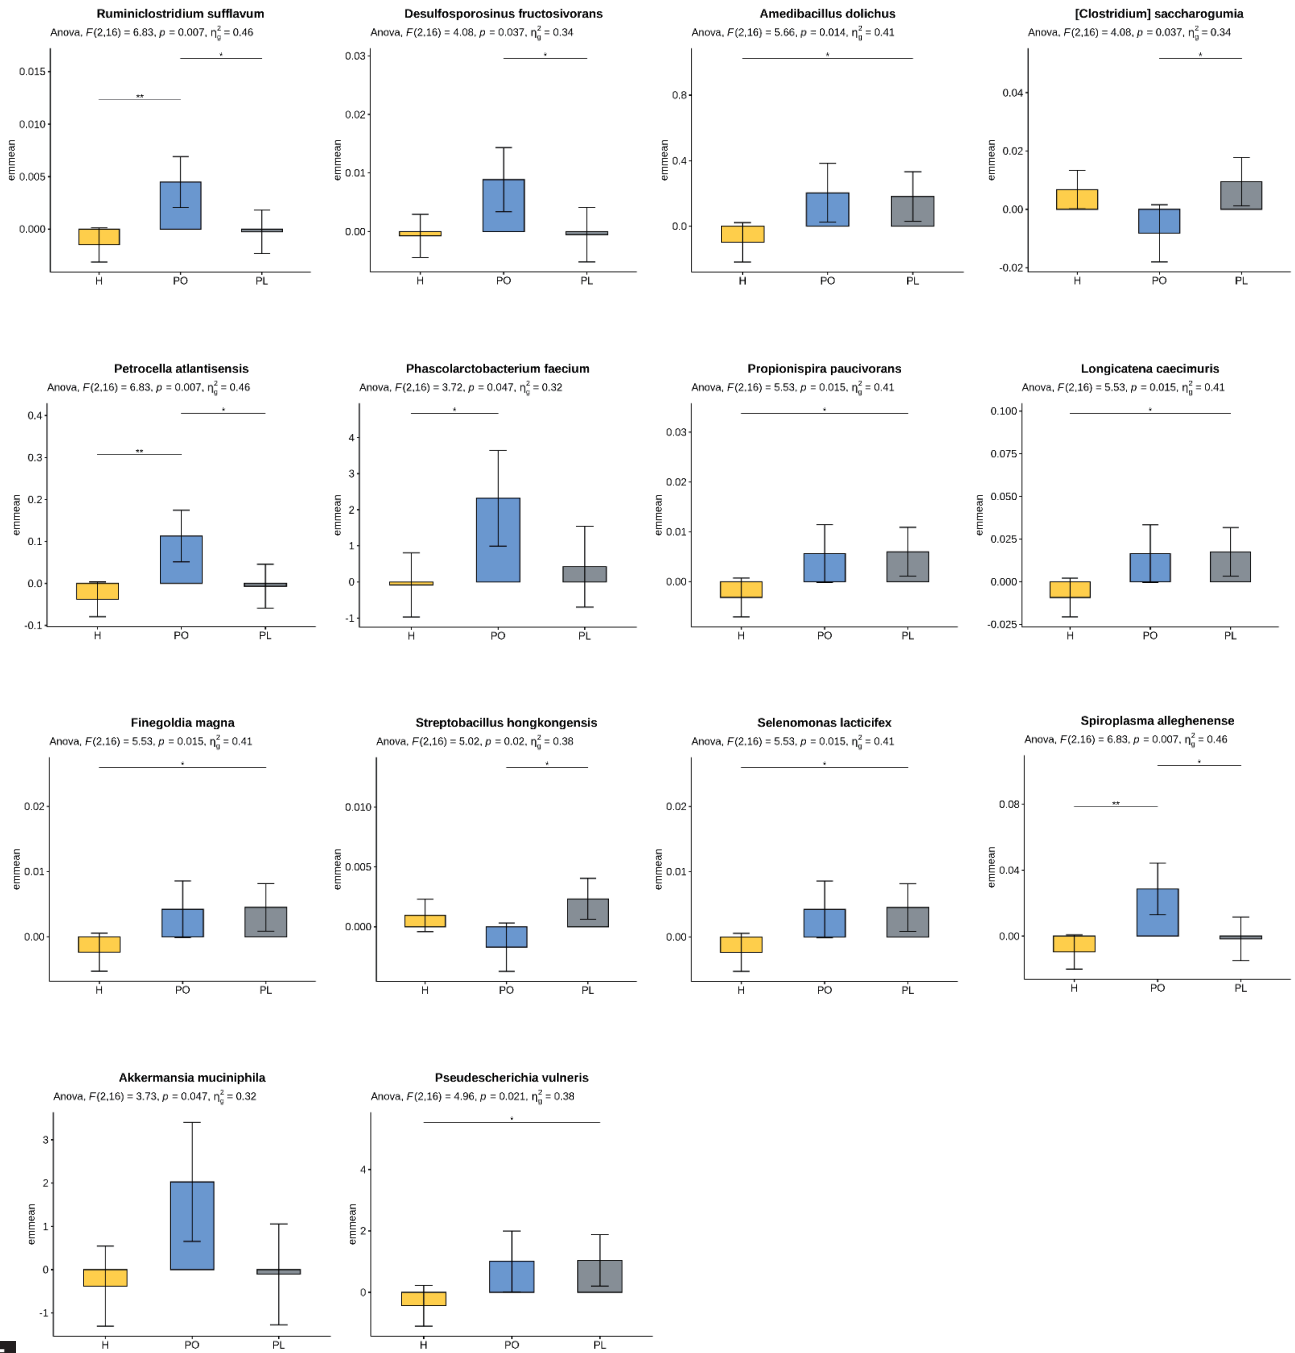

Supplementary Figure 2. Continued
